# Supplementary material for: LncRNA PCAT1 and its genetic variant rs1902432 are associated with prostate cancer risk
Source: PubMed Central journal article supplement — J Cancer. 2018 Apr 6;9(8):1414–20. doi: 10.7150/jca.23685 (PMC5929086; doi:10.7150/jca.23685), 2018-04-06

**Supplementary Table 1. Characteristics of the four selected tagSNPs in *PCAT1***

| TagSNPs    | Chr | Position (hg19) | Allele (Ref > Alt) | ASN freq <sup>a</sup> | Location in PCAT1 |
|------------|-----|-----------------|--------------------|-----------------------|-------------------|
| rs16901904 | 8   | 128027502       | T > C              | 0.21                  | intron            |
| rs1902432  | 8   | 128024811       | A > G              | 0.44                  | 5'UTR             |
| rs710886   | 8   | 128026860       | C > T              | 0.50                  | intron            |
| rs4871771  | 8   | 128029101       | A > T              | 0.64                  | intron            |

<sup>a</sup>The allele frequency in Asian population were obtained from HaploReg v4.1(<http://archive.broadinstitute.org/mammals/haploreg/haploreg.php>).

## Supplementary Figure legends

**Supplementary Fig.1** DNA sequencing and transient transfection of *PCAT1*

overexpression plasmid.

**Supplementary Fig.2** Differentially expressed Genes between DU145 cells treated with *PCAT1* overexpression vector and NC vector.

**(a)** Heatmap shows that the gene expression pattern from DU145 cells transfected with *PCAT1* overexpression vector is significantly different from that from DU145 cell transfected with NC vector. The values are color coded using a green-red scale.

Red indicates up-regulated genes and the green means down-regulated genes.

**(b)** Volcano plot shows the differentially expressed genes between DU145 cells transfected with overexpression of *PCAT1* or NC vector. The red and green dot means significantly up-regulated and down-regulated genes, respectively.

**Supplementary Fig.3** KEGG pathway analysis. Significantly enriched pathways ( $P < 0.05$ ) are presented. The size of each circle means the number of differentially expressed gene enriched in the corresponding pathway.



Supplementary Fig.2

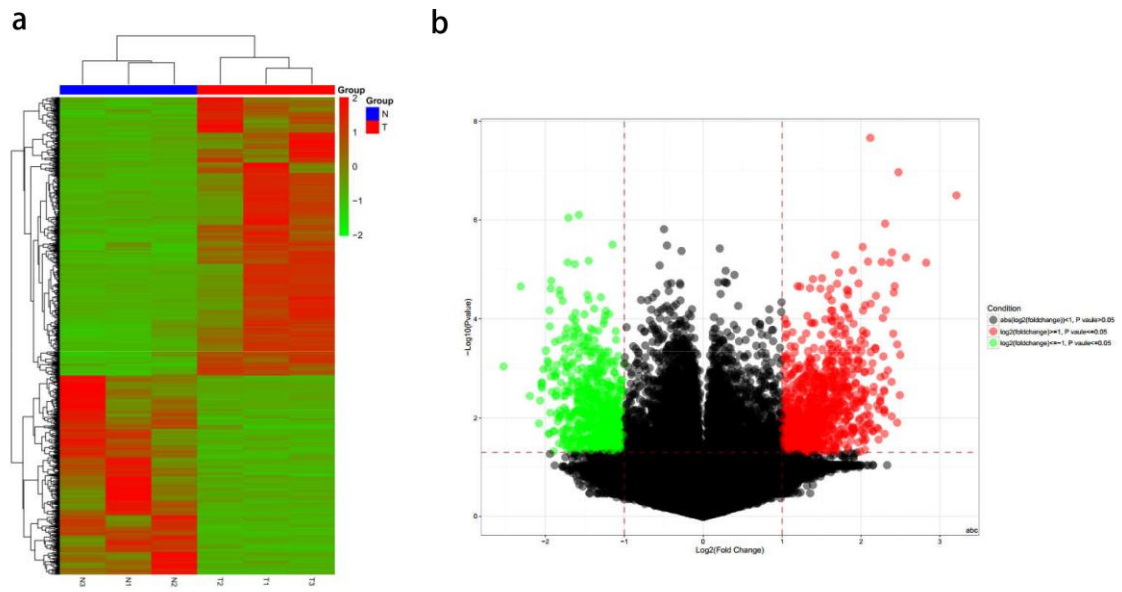

Supplementary Fig.3

### N\_vs\_T

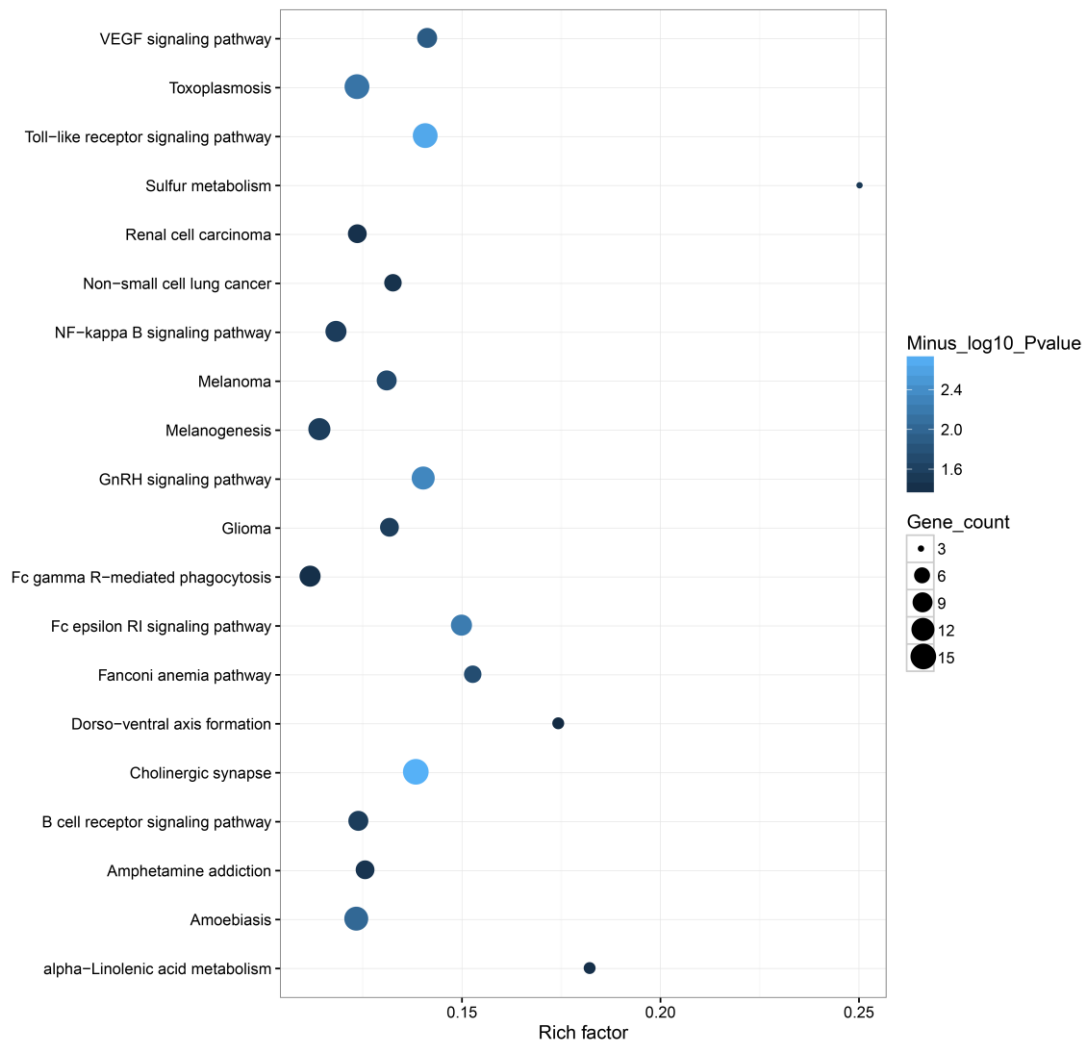

Supplement: jcav09p1414s1.pdf [file jcav09p1414s1.pdf]
